# Supplementary material for: Optimization of a protocol for launching grapevine infection with the biologically active cDNA clones of a virus
Source: Preprints.org preprint supplement (doi:10.20944/preprints202310.0519.v1), 2023-10-09
Supplement: Supplementary file 1 [file supplementary]

Article

Optimization of a Protocol for Launching Grapevine Infection with the Biologically Active cDNA Clones of a Virus

Mehdi Shabanian 1,*, Caihong Li 1, Ali Ebadi 2, Valerian Dolja 3 and Baozhong Meng 1

1 Department of Molecular and Cellular Biology, University of Guelph, Guelph, Ontario, Canada; caihong@uoguelph.ca (C.L.); bmeng@uoguelph.ca (B.M.)

2 Department of Horticulture, College of Agriculture and Natural Resources, University of Tehran, Karaj, Iran; aebadi@ut.ac.ir

3 Department of Botany and Plant Pathology, Oregon State University, Corvallis, Oregon, USA; doljav@oregonstate.edu

***** Correspondence: shabania@uoguelph.ca

Supplemental Tables:

| **Citation:** Shabanian, M.; Li, C.; Ebadi, A.; Dolja, V.; Meng, B. Optimization of a Protocol for Launching Grapevine Infection with the Biologically Active cDNA Clones of a Virus. *Pathogens* 2023, *12*, x. https://doi.org/10.3390/xxxxx  Academic Editor(s): Name  Received: date  Revised: date  Accepted: date  Published: date  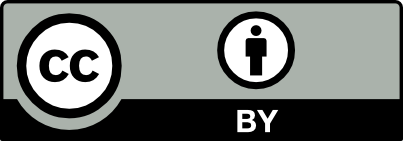  **Copyright:** © 2023 by the authors. Submitted for possible open access publication under the terms and conditions of the Creative Commons Attribution (CC BY) license (https://creativecommons.org/licenses/by/4.0/). |
| --- |

**Table S1.** Agar media for all grape stages OH, GS1, GS2 and GS3.

| **Media stage** | **OHmedium.**  **pH: 5.7** | **GSI**  **pH: 5.3** | **GS2**  **pH: 5.3** | **GS3**  **pH: 5.3** |
| --- | --- | --- | --- | --- |
| Ingredients / 1 liter |
| M & S salts | 3.22 g | 3.22 g | 3.22 g | 3.22 g |
| Thiamine | 0.8 ml (0.5 mg/ml) | 0.8 ml (0.5 mg/ml) | 0.8 ml (0.5 mg/ml) | 0.8 ml (0.5 mg/ml) |
| Inositol | 0.100 g | 0.1 g | 0.025 g | 0.025 g |
| Sucrose | 7 g | 20 g | 15 g | 12.5 g |
| BAP | _ | 2 ml(0.5 mg/ml) | 4 ml(0.5 mg/ml) | ­_ |
| NaH2PO4 | 0.170 g | _ | 0.05 g | _ |
| Adenine sulfate | 0.08 g | _ | _ | _ |
| IAA | _ | _ | 0.5 ml (1mg/ml) | 1 ml (1mg/ml) |
| Agar | 3 g | 2 g | 2 g | 1 g |
| Gelrite | _ | 1.13 g | 1.2 g | 1 g |
| Cefotaxime | 0.2 g | 0.2 g | 0.2 g | 0.2 g |

**Table S2.** Primers were used in this study.

| **Primers** | **Sequences** | **Amplicon (bp)** | **Target gene** |
| --- | --- | --- | --- |
| LR3CP107F | TCTTAAARTAYGTTAAGGACGG | 836 | CP of GLRaV-3 |
| LR3CP942R | CTAGTTCTTTTGCAATAGTTG |
| LR3_14117F | GTGCCGGAATCTGAGACTCT | 211 |
| LR3_14327R | GCCCATAACCTTCTTACACAGC |
| LR3_16289F | GTTCGGAGACGTATAACATC | 951 | ORF8 &9 of GLRaV-3 |
| LR3_17240R | CTAATCCTCGATTCTCCCCTGAC |
| LR3_16896F | CGCTTAAAACGAACGATCAC | 344 | ORF9 of GLRaV-3 |
| LR3_17240R | CTAATCCTCGATTCTCCCCTGAC |
| LR2-C-F | AAGGAATACTTAGGCGCCGAC | 1458 | 3' end region including GFP of GFP-tagged GLRaV-2 |
| LR2-C-R | AGGAGCCCCTTTCTGCACCAA |
| eGFP-F | AAAGGTACCGTGAGCAAGGGCGAGGA | 720 | eGFP |
| eGFP-R | AAAGGATCCTTACTTGTACAGCTCGTCCATGC |
| ACT-1021F | ATCAGGAAGGACCTCTATGG | 206 | Actin 1 of grapevine |
| ACT-1226R | ATCCACATCTGCTGGAAGG |
